# Supplementary material for: Design of a Chimeric Multi-Epitope Vaccine (CMEV) against Both Leishmania martiniquensis and Leishmania orientalis Parasites Using Immunoinformatic Approaches
Source: MDPI journal article supplement (doi:10.3390/biology11101460), 2022-10-05
Supplement: s1 [file s1]

## Supplementary data

**Supplementary Table S1.** Details of B-cell epitopes.

|    | <i>L. martiniquensis</i> | <i>L. orientalis</i> | B-CELL EPITOPE | Antigenicity |
|----|--------------------------|----------------------|----------------|--------------|
| 1  | CN030422.1.g3678         | k59_6959.g7826       | RRLLEGDRDS     | 1.1104       |
| 2  | CN030417.1.g2464         | k59_8122.g3660       | REWRLVHRL      | -0.3635      |
| 3  | CN030426.1.g5328         | k59_3810.g2871       | HHPFVISGNW     | 1.591        |
| 4  | CN030405.1.g85           | k59_8079.g2401       | LVGSAETCIV     | 0.6586       |
| 5  | CN030411.1.g1102         | k59_7325.g3419       | ELLETVMMDV     | -0.0358      |
| 6  | CN030414.1.g1733         | k59_1681.g2029       | IESEARAALQ     | 1.1867       |
| 7  | CN030430.1.g7697         | k59_6133.g7748       | RMNRANQVYSI    | 0.4402       |
| 8  | CN030412.1.g1340         | k59_4380.g3725       | THVNALREV      | 0.0907       |
| 9  | CN030421.1.g3586         | k59_9180.g3154       | RIDNLTPATT     | 0.6515       |
| 10 | CN030429.1.g7028         | k59_748.g6249        | DPKLGSLQPI     | 0.5804       |
| 11 | CN030408.1.g620          | k59_7892.g4284       | VSEALLESRL     | 0.6877       |
| 12 | CN030431.1.g7874         | k59_2726.g2266       | LRNVSLTLQD     | 0.6631       |
| 13 | CN030402.1.g9136         | k59_5929.g1357       | VQEQYLRN       | 0.7325       |
| 14 | CN030402.1.g9114         | k59_9933.g1615       | LQQWAFSLF      | 0.673        |
| 15 | CN030425.1.g4940         | k59_5159.g3601       | IANSSPLPCT     | 1.0008       |
| 16 | CN030420.1.g3164         | k59_328.g2467        | LPSPQDIEHA     | 0.1363       |

**Supplementary Table S2.** Predicted A2, A3 and B7 supertype CTL epitopes.

|    | CTL epitope         |        |              |                     |        |              |                     |        |              |
|----|---------------------|--------|--------------|---------------------|--------|--------------|---------------------|--------|--------------|
|    | Supertype A2        |        |              | Supertype A3        |        |              | Supertype B7        |        |              |
|    | Amino acid sequence | Score  | Antigenicity | Amino acid sequence | Score  | Antigenicity | Amino acid sequence | Score  | Antigenicity |
| 1  | FLDPEPLGV           | 1.4314 | 1.2248       | KTLLAAAMHK          | 1.5889 | 0.4143       | IPANSTCLL           | 1.6319 | 0.4149       |
| 2  | FLFDESNIL           | 1.4269 | -0.2443      | QLRRPFLLK           | 1.6515 | 0.6344       | LPRSVRIIF           | 1.7595 | 0.4836       |
| 3  | TMLECIYYL           | 1.5528 | 0.9859       | RLLPHVLAK           | 1.5868 | -0.1514      | APSWCSTVL           | 1.8113 | 0.5628       |
| 4  | ALLSFPSSV           | 1.3667 | 0.2795       | STFTVSLPY           | 1.446  | 0.9065       | NPVSYTVSF           | 1.6911 | 0.2925       |
| 5  | SMLARDFGV           | 1.3756 | -0.3371      | LLYLPFCYK           | 1.6866 | 0.8986       | RVRDGNVAL           | 1.8336 | 0.9381       |
| 6  | FLLECQQFV           | 1.4063 | 1.509        | LLLSSSVSY           | 1.2849 | 0.219        | IPLSARHPL           | 1.7472 | 0.5824       |
| 7  | FLTQDVLAV           | 1.4475 | 0.3596       | RLHQPSLEK           | 1.7119 | -0.2921      | TPRTHATVL           | 1.7781 | 0.917        |
| 8  | LMDDYTVHL           | 1.502  | 0.6336       | RQHHAIFS            | 1.5722 | 0.008        | APRSASEAL           | 1.7835 | 0.0269       |
| 9  | FMTHNIIQL           | 1.4006 | 0.328        | CVTSPILSK           | 1.4371 | 0.4913       | LPSPSKDSL           | 1.6597 | 0.5384       |
| 10 | TLYDYYFDL           | 1.5407 | 0.997        | RTLAPQLKK           | 1.637  | 0.1005       | RPLVFTLAF           | 1.82   | 1.403        |
| 11 | SLAAALAAV           | 1.3402 | 0.1461       | RSYTMPPLY           | 1.6739 | 0.2513       | RVRFLRRVL           | 1.8026 | 2.0869       |
| 12 | YLSRFIENV           | 1.4426 | 1.6355       | RSFLWPLYR           | 1.4839 | 0.7472       | SPSEFRAAL           | 1.8343 | 0.8273       |
| 13 | AVMAATWSV           | 1.4432 | 0.5309       | LLGRFFFR            | 1.5952 | 2.3608       | WPVPMRGIF           | 1.6386 | 0.4248       |
| 14 | NLIDFNFKL           | 1.4685 | 1.0674       | TTLFVSLVK           | 1.4836 | 0.7296       | SPQPATAAL           | 1.7869 | 0.6939       |
| 15 | KLFDGFPPL           | 1.5438 | 0.4642       | KLHFSIALR           | 1.638  | 0.5372       | FPIPLTNPL           | 1.6645 | 1.1079       |
| 16 | YMWSTDVCL           | 1.4589 | 1.0686       | RLAWAALQR           | 1.5326 | -0.8802      | RASAAGVVL           | 1.5219 | 1.0727       |

**Supplementary Table S3.** Details of HTL epitopes.

| <i>L. martiniquensis</i> |                  | <i>L. orientalis</i> | HTL epitope    |                     |      |                     |              |
|--------------------------|------------------|----------------------|----------------|---------------------|------|---------------------|--------------|
|                          |                  |                      | Allele         | Amino acid sequence | IC50 | SMM align IC50 (nM) | Antigenicity |
| 1                        | CN030422.1.g3678 | k59_6959.g7826       | HLA-DRB1*07:01 | KAKGREFLRSKSSDI     | 4    | 0.128               | 0.6689       |
| 2                        | CN030417.1.g2464 | k59_8122.g3660       | HLA-DRB1*01:01 | HYDFGLRALKSVLVA     | 2    | 0.064               | 0.3061       |
| 3                        | CN030426.1.g5328 | k59_3810.g2871       | HLA-DRB1*11:01 | LVFEFLFNILLRARQ     | 5    | 0.148               | 1.2509       |
| 4                        | CN030405.1.g85   | k59_8079.g2401       | HLA-DRB1*07:01 | LLFNTTVALDVVLDN     | 6    | 0.165               | 0.5229       |
| 5                        | CN030411.1.g1102 | k59_7325.g3419       | HLA-DRB1*15:01 | KYIAALLVPYLSKYV     | 6    | 0.165               | 0.9843       |
| 6                        | CN030414.1.g1733 | k59_1681.g2029       | HLA-DRB4*01:01 | SQATLVLERLQRLW      | 13   | 0.237               | 0.4712       |
| 7                        | CN030430.1.g7697 | k59_6133.g7748       | HLA-DRB1*04:01 | QPQFLRLLSFTALRT     | 19   | 0.272               | 0.2185       |
| 8                        | CN030412.1.g1340 | k59_4380.g3725       | HLA-DRB1*01:01 | AEYVSGLMLRAVLA      | 2    | 0.064               | 0.4838       |
| 9                        | CN030421.1.g3586 | k59_9180.g3154       | HLA-DRB1*01:01 | SDPVPFYTLKPVAVR     | 2    | 0.064               | 0.1528       |
| 10                       | CN030429.1.g7028 | k59_748.g6249        | HLA-DRB1*01:01 | HHYDWGLRALKAVLV     | 2    | 0.064               | 0.5008       |
| 11                       | CN030408.1.g620  | k59_7892.g4284       | HLA-DRB1*11:01 | AALRVLLRLVRRARA     | 5    | 0.148               | 0.5194       |
| 12                       | CN030431.1.g7874 | k59_2726.g2266       | HLA-DRB1*04:01 | FGFFRGVSATSEFYA     | 29   | 0.3                 | -0.4509      |
| 13                       | CN030402.1.g9136 | k59_5929.g1357       | HLA-DRB1*11:01 | YALKAYYYLRRRQPA     | 3    | 0.1                 | 0.5762       |
| 14                       | CN030402.1.g9114 | k59_9933.g1615       | HLA-DRB1*15:01 | TEDQLLRFLKGFYSV     | 14   | 0.243               | -0.405       |
| 15                       | CN030425.1.g4940 | k59_5159.g3601       | HLA-DRB1*07:01 | AAFLSTAASMVGRRN     | 2    | 0.064               | 0.1927       |
| 16                       | CN030420.1.g3164 | k59_328.g2467        |                | NF                  |      |                     |              |

**Supplementary Table S4.** Model after refinement using Galaxy Web

| <b>Model</b>   | <b>GDT-HA RMSD</b> |          | <b>MolProbity</b> | <b>Clash score</b> | <b>Poor rotamers</b> | <b>Rama favored</b> |
|----------------|--------------------|----------|-------------------|--------------------|----------------------|---------------------|
| <b>Initial</b> | <b>1</b>           | <b>0</b> | <b>3.154</b>      | <b>15.3</b>        | <b>9.8</b>           | 81.7                |
| MODEL 1        | 0.898              | 0.565    | 0.858             | 1.3                | 0                    | 99.3                |
| MODEL 2        | 0.9139             | 0.552    | 0.876             | 1.4                | 0.2                  | 99                  |
| MODEL 3        | 0.8972             | 0.59     | 0.958             | 1.9                | 0.2                  | 98.8                |
| MODEL 4        | 0.9202             | 0.537    | 0.972             | 2                  | 0                    | 98.3                |
| MODEL 5        | 0.9059             | 0.531    | 0.893             | 1.5                | 0.2                  | 98.5                |

**Supplementary Table S5.** Conformational B-Cell epitopes from refined model.

| Residues                                                                                                                                                                                                                                                                                                                                                                                                                             | Number of residues | Score |
|--------------------------------------------------------------------------------------------------------------------------------------------------------------------------------------------------------------------------------------------------------------------------------------------------------------------------------------------------------------------------------------------------------------------------------------|--------------------|-------|
| A:R511, A:I512, A:D513, A:N514, A:L515, A:T516, A:P517, A:A518, A:T519, A:T520, A:K521                                                                                                                                                                                                                                                                                                                                               | 11                 | 0.934 |
| A:K522, A:D523, A:P524, A:K525, A:L526, A:G527, A:S528, A:L529, A:Q530, A:P531, A:I532, A:K533, A:K534                                                                                                                                                                                                                                                                                                                               | 13                 | 0.849 |
| A:H475, A:H476, A:P477, A:F478                                                                                                                                                                                                                                                                                                                                                                                                       | 4                  | 0.837 |
| A:T361, A:V362, A:H363, A:L364, A:A365, A:A366, A:Y367, A:L368, A:P369, A:S370, A:P371, A:S372, A:K373, A:D374, A:S375, A:L376, A:A377, A:A378, A:Y379, A:R380, A:P381, A:L382, A:V383, A:F384, A:T385, A:L386, A:A387, A:F388, A:A389, A:A390, A:Y391, A:R392                                                                                                                                                                       | 32                 | 0.832 |
| A:S308, A:T309, A:F310, A:T311, A:V312, A:S313, A:L314, A:P315, A:Y316, A:A317, A:A318, A:Y319, A:R320, A:V321, A:R322                                                                                                                                                                                                                                                                                                               | 15                 | 0.791 |
| A:D471, A:S472, A:K473                                                                                                                                                                                                                                                                                                                                                                                                               | 3                  | 0.786 |
| A:D323, A:G324, A:N325, A:V326, A:A327, A:L328, A:A329, A:A330, A:Y331, A:F332, A:L333, A:L334, A:E335, A:C336, A:Q337, A:Q338, A:F339, A:A341, A:A342, A:T344                                                                                                                                                                                                                                                                       | 20                 | 0.78  |
| A:V479, A:I480, A:S481, A:G482, A:N483, A:W484, A:K485, A:L487, A:V488, A:G489, A:S490, A:A491, A:E492, A:T493, A:C494, A:I495, A:V496, A:K497, A:K498, A:I499, A:E500, A:S501, A:E502, A:A503, A:R504, A:A505, A:A506, A:L507, A:Q508, A:K509, A:K510                                                                                                                                                                               | 32                 | 0.758 |
| A:L465, A:L466, A:E467, A:G468, A:D469                                                                                                                                                                                                                                                                                                                                                                                               | 5                  | 0.731 |
| A:S587, A:P588, A:L589, A:P590, A:C591, A:T592, A:H593, A:H594                                                                                                                                                                                                                                                                                                                                                                       | 8                  | 0.702 |
| A:S61, A:L67, A:E68, A:A69, A:A70, A:G71, A:D72, A:K73, A:K74, A:I75, A:G76, A:V77, A:I78, A:K79, A:V80, A:V81, A:R82, A:E83, A:I84, A:V85, A:S86, A:G87, A:L88, A:G89, A:L90, A:K91, A:E92, A:A93, A:K94, A:D95, A:L96, A:V97, A:D98, A:G99, A:A100, A:P101, A:K102, A:V108, A:A109, A:K110, A:E111, A:A112, A:A113, A:D114, A:E115, A:A116, A:K117, A:A118, A:K119, A:L120, A:E121, A:A122, A:A123, A:G124, A:A125, A:T126, A:V127 | 57                 | 0.698 |
| A:M1, A:A2, A:K3, A:L4, A:S5, A:E8, A:L9, A:D11, A:A12, A:F13, A:K14, A:E15, A:M16, A:T17, A:L18, A:L19, A:E20, A:L21, A:S22, A:D23, A:F24, A:V25, A:K26, A:K27, A:F28, A:E29, A:E30, A:T31, A:F32, A:V34, A:T35, A:A36                                                                                                                                                                                                              | 32                 | 0.69  |
| A:V535, A:S536, A:E537, A:A538, A:L539, A:L540, A:E541, A:S542, A:L543, A:R544, A:K545, A:K546                                                                                                                                                                                                                                                                                                                                       | 12                 | 0.657 |
| A:A38, A:P39, A:V40, A:A41, A:V42, A:A43, A:A44, A:A45, A:G46, A:A47, A:A48, A:P49, A:A50, A:G51, A:A52, A:A53, A:V54, A:E55                                                                                                                                                                                                                                                                                                         | 16                 | 0.646 |
| A:S454, A:A455, A:G457, A:V458, A:V459, A:K461, A:K462                                                                                                                                                                                                                                                                                                                                                                               | 7                  | 0.627 |
| A:M357, A:D359, A:Y360                                                                                                                                                                                                                                                                                                                                                                                                               | 3                  | 0.572 |
| A:D223, A:W224, A:R227                                                                                                                                                                                                                                                                                                                                                                                                               | 3                  | 0.567 |
| A:N549, A:V550, A:S551, A:L552, A:T553, A:L554                                                                                                                                                                                                                                                                                                                                                                                       | 6                  | 0.552 |
| A:K215, A:K219, A:H220, A:Y222                                                                                                                                                                                                                                                                                                                                                                                                       | 4                  | 0.548 |
| A:R263, A:Q266, A:P267, A:A268, A:A269, A:A270, A:Y271, A:L273, A:D274, A:P275, A:E276                                                                                                                                                                                                                                                                                                                                               | 11                 | 0.547 |
